# Supplementary material
Source: PubMed Central journal article supplement (PMC4699579)

# J | A | C | S

JOURNAL OF THE AMERICAN CHEMICAL SOCIETY

J. Am. Chem. Soc., 1997, 119(6), 1480-1481, DOI:[10.1021/ja962703f](https://doi.org/10.1021/ja962703f)

## Terms & Conditions

Electronic Supporting Information files are available without a subscription to ACS Web Editions. The American Chemical Society holds a copyright ownership interest in any copyrightable Supporting Information. Files available from the ACS website may be downloaded for personal use only. Users are not otherwise permitted to reproduce, republish, redistribute, or sell any Supporting Information from the ACS website, either in whole or in part, in either machine-readable form or any other form without permission from the American Chemical Society. For permission to reproduce, republish and redistribute this material, requesters must process their own requests via the RightsLink permission system. Information about how to use the RightsLink permission system can be found at <http://pubs.acs.org/page/copyright/permissions.html>

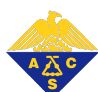

ACS Publications

MOST TRUSTED. MOST CITED. MOST READ.

Copyright © 1997 American Chemical Society

**REVISED**  
**Diastereocontrolled Synthesis of Carbon Glycosides of**  
***N*-Acetylneuraminic Acid *via* Glycosyl Samarium(III)**  
**Intermediates**

Iontcho R. Vlahov<sup>‡</sup>, Petinka I. Vlahova and Robert J. Linhardt<sup>\*</sup>  
 Division of Medicinal and Natural Products Chemistry,  
 and Department of Chemical and Biochemical Engineering, PHAR-S328,  
 University of Iowa, Iowa City, IA 52242

**SUPPORTING INFORMATION**

**General methods.** *N*-Acetylneuraminic acid was purchased (Snow Brand Milk Products Company Ltd., Tokyo, Japan). All other reagents and solvents were of reagent grade and were dried using standard procedures. Optical rotations were measured with a Perkin Elmer 141 polarimeter at 22°C. <sup>1</sup>H NMR spectra were recorded at 25°C on a Varian Unity 500 MHz spectrometer and chemical shifts are given in ppm from tetramethylsilane as internal standard. All reactions were monitored by thin layer chromatography on aluminum sheets, silica gel 60 F<sub>254</sub> (Merck); detection under short wavelength UV light (254 nm) and by dipping the plates into staining solution (1.0 g ceric ammonium sulfate and 24.0 g ammonium molybdate in 31 mL sulfuric acid 470 mL water) then heating. Flash chromatography was performed using 230-400 mesh silica gel 60 (Aldrich).

**Synthesis and Analysis of New Compounds 10 and 11:**

*Methyl 5-acetamido-4,7,8,9-tetra-O-acetyl-2,6-anhydro-3,5-dideoxy-2-C-((S)-hydroxy-[3-(methyl 2,4,6-tri-O-benzyl-3-deoxy- $\alpha$ -D-galactopyranosidyl)]-methyl)-D-erythro-L-manno-nononate (10):* To a vigorously stirred neat mixture of 120 mg (0.2 mmol) [methyl (5-acetamido-4,7,8,9-tetra-*O*-acetyl-3,5-dideoxy- $\alpha$ -D-glycero-D-galacto-2-nonulopyranosyl)onate] 2-pyridyl sulfone (**8**) and 165 mg (0.3 mmol) methyl 2,4,6-tri-*O*-benzyl-3-deoxy-3-*C*-(formyl)- $\alpha$ -D-galactopyranoside (**9**) under argon a 0.1M solution of freshly prepared SmI<sub>2</sub> in THF (7 mL, 0.7 mmol) was added dropwise at 20°C. Stirring was continued for 45 min, than the reaction mixture was poured into an aqueous ammonium chloride solution and extracted twice with ethyl acetate. The combined organic

layers were dried ( $\text{MgSO}_4$ ) and concentrated *in vacuo*. The residue was purified by flash chromatography with light petroleum / ethyl acetate (1:3) to yield 167 mg (88%) of **10** as a colorless foam. TLC (light petroleum / ethyl acetate, 1:3):  $R_f=0.32$ .  $[\alpha]_D^{22}=-18$  (c=1, chloroform).  $^1\text{H-NMR}$ :  $\delta = 1.89\text{-}2.14$  (5s, 15H, 5  $\text{COCH}_3$ ), 2.03 (under an  $\text{COCH}_3$  signal is 1H, H-3'  $_{ax}$ ), 2.51 (dd,  $J_{3'_{ax},3'_{eq}} = 12.9$  Hz,  $J_{3'_{eq},4'} = 4.6$  Hz, 1H, H-3'  $_{eq}$ ), 2.79 (bd,  $J_{2,3} = 6.3$  Hz,  $J_{3,4}$  and  $J_{3,3''} < 0.5$  Hz, 1H, H-3), 3.45 (s, 3H,  $\text{OCH}_3$ ), 3.57 - 3.58 (m, 2H, 2 H-6), 3.87 (bs,  $J_{3'',OH} = J_{3'',3} < 0.5$  Hz, 1H, H-3''), 3.90 (dd,  $J_{5',6'} = 10.7$  Hz,  $J_{6',7'} = 2.1$  Hz, 1H, H-6'), 3.97 - 4.01 (m, 2H, H-2 and H-5'), 4.05 (dd,  $J_{8',9'_A} = 6.1$  Hz,  $J_{9'_A,9'_B} = 12.3$  Hz, 1H, H-9'  $_A$ ), 4.31 (dd,  $J_{8',9'_B} = 3.9$  Hz, 1H, H-9'  $_B$ ), 4.39 (m, 2H, H-5 and OH), 4.41 - 4.66 (m, 7H, 3  $\text{CH}_2\text{Ph}$  and H-4 at  $\delta = 4.55$ ), 4.90 (ddd,  $J_{3'_{ax},4'} = J_{4',5'} = 11.6$  Hz, 1H, H-4'), 5.15 (bd,  $J_{NH,5'} = 9.8$  Hz, 1H, NH), 5.28 (dd,  $J_{7',8'} = 7.7$  Hz, 1H, H-7'), 5.42 (ddd, 1H, H-8'), 7.12 - 7.42 (m, 15H, 3 Ph).

Anal. Calcd for  $\text{C}_{49}\text{H}_{61}\text{N}_1\text{O}_{18}$  (952.02): C, 61.82; H, 6.46; N, 1.47. Found: C, 61.47; H, 6.53; N, 1.26.

*Synthesis of Methyl 5-acetamido-4,7,8,9-tetra-O-acetyl-2,6-anhydro-3,5-dideoxy-2-C [hydroxy-4-(tert-butylcyclohexyl)] -D-erythro-L-manno-nononate (II).*

To a vigorously stirred neat mixture of 120 mg (0.2 mmol) [methyl (5-acetamido-4,7,8,9-tetra-O-acetyl-3,5-dideoxy- $\alpha$ -D-glycero-D-galacto-2-nonulopyranosyl)onate] 2-pyridyl sulfone (**8**) and 83.0 mg (0.6 mmol) 4-*tert*-butylcyclohexanone under argon a 0.1M solution of freshly prepared  $\text{SmI}_2$  in THF (7 mL, 0.7 mmol) was added dropwise at 20°C. Stirring was continued for 45 min, then the reaction mixture was poured into an aqueous ammonium chloride solution and extracted twice with ethyl acetate. The combined organic layers were dried ( $\text{MgSO}_4$ ) and concentrated *in vacuo*. The residue was purified by flash chromatography with light petroleum / ethyl acetate (1:3) to yield 167 mg (90%) of **11** as a colorless oil. TLC (light petroleum / ethyl acetate, 1:3):  $R_f=0.6$ .  $[\alpha]_D^{22} = -12$  (c=1, chloroform).  $^1\text{H-NMR}$ :  $\delta = 0.88$  (s, 9H), 1.19 (dt,  $J=13.1$  Hz,  $J=3,3$  Hz), 1.42 (m, 3H), 1.60 (m, 3H), 1.78 (m, 1H), 1.85 (m, 3H), 1.87 (s, 3H), 1.96 (t,  $J=12.4$  Hz), 2.02 (s,

3H), 2.05 (s, 3H), 2.12 (s, 3H), 2.16 (s, 3H), 2.46 (dd,  $J=12.4$  Hz,  $J=4.5$  Hz), 2.57 (s, 1H), 3.79 (s, 3H), 3.99 (m, 2H), 4.07 (dd, 1H,  $J=12.3$  Hz,  $J=6.2$  Hz), 4.32 (dd, 1H,  $J=12.3$  Hz,  $J=2.5$  Hz), 4.76 (m, 1H), 5.16 (bd, 1H,  $J=8.8$  Hz), 5.30 (d, 1H,  $J=6.1$  Hz), 5.42 (dt,  $J=6.1$  Hz,  $J=2.4$  Hz). Anal. Calcd for  $C_{30}H_{47}N_1O_{13}$  (629.70): C, 57.22; H, 7.52; n, 2.22. Found: C, 56.94; H, 7.63; N, 1.94.

```

expl pulse sequence: pss2pul
SAMPLE SPECTRUM
date Jul 11 96 su 5999.7
temp 25.0 fb 5500
solvent CDCl3 at 4.000
PULSE SEQUENCE np 48000
pad 0 ct 16
d1 10 ss 2
pu 6.4 gain 40
satp00 nn PROCESSING
satp01 0 fn 131072
satf01 -172.9 lb 0.250
prea01 0 DISPLAY
OBSERVE ap -121.4
tn H1 up 3950.0
sfrq 499.725 va 242
tol -172.9 ac 0
pu00 6.6 uc 250
tpur 56 axia p
DECOUPLE H1 ril 677.9
dn H1 rip 0
dfrq 499.724 lp -1.4
dof -636.7 rp 104.1
pp undefined ph ph
dn nnn
das ccc
daf 4000
dpu 7
dsq 1.0
das v
DECE
dn2 0
dfrq2 0
dof2 0
dpu2 1
hono n

```

<sup>1</sup>H-NMR spectrum of *methyl 5-acetamido-4,7,8,9-tetra-O-acetyl-2,6-anhydro-3,5-dideoxy-2-C-((S)-hydroxy-[3-(methyl 2,4,6-tri-O-benzyl-3-deoxy- $\alpha$ -D-gactopyranosidyl)]al-methyl)-D-erythro-L-manno-nononate (10)*.

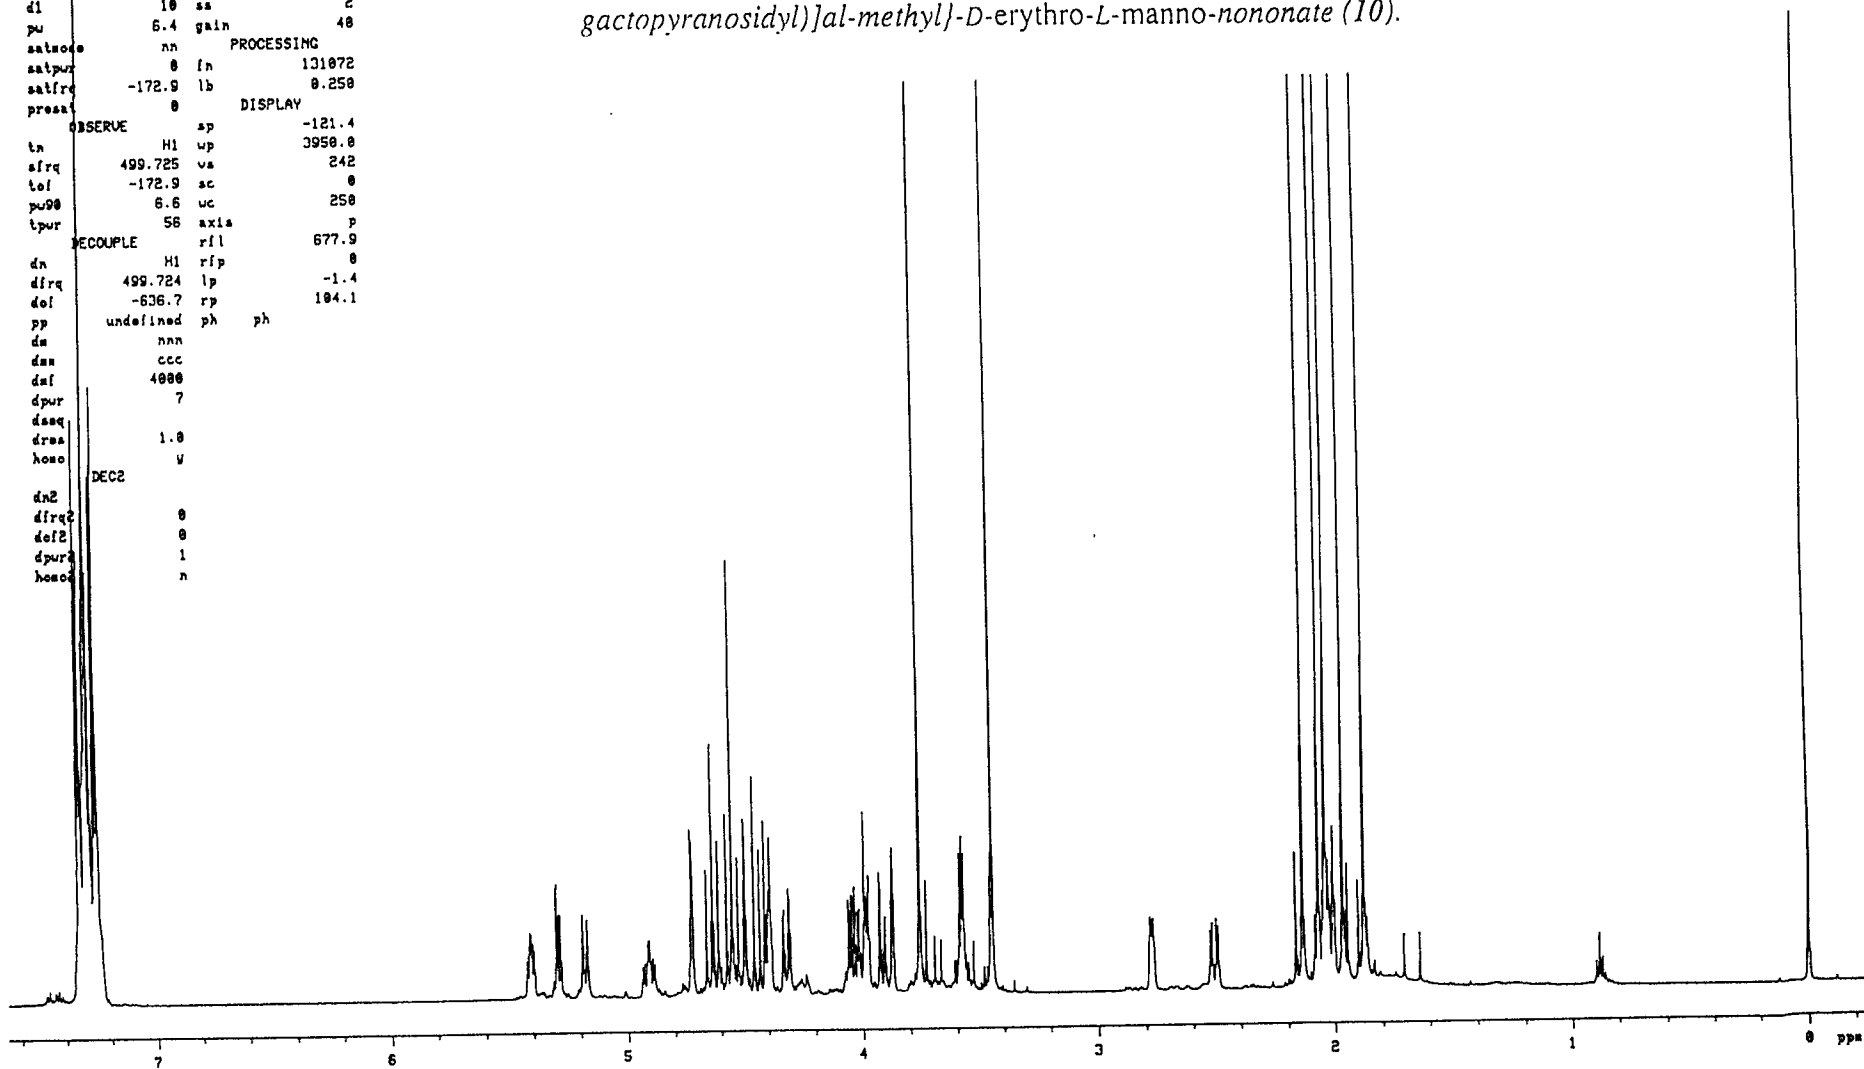

A selected portion of the  $^1\text{H-NMR}$  spectrum of *methyl 5-acetamido-4,7,8,9-tetra-O-acetyl-2,6-anhydro-3,5-dideoxy-2-C-[(S)-hydroxy-[3-(methyl 2,4,6-tri-O-benzyl-3-deoxy- $\alpha$ -D-galactopyranosidyl)]-methyl]-D-erythro-L-manno-nononate (10)*.

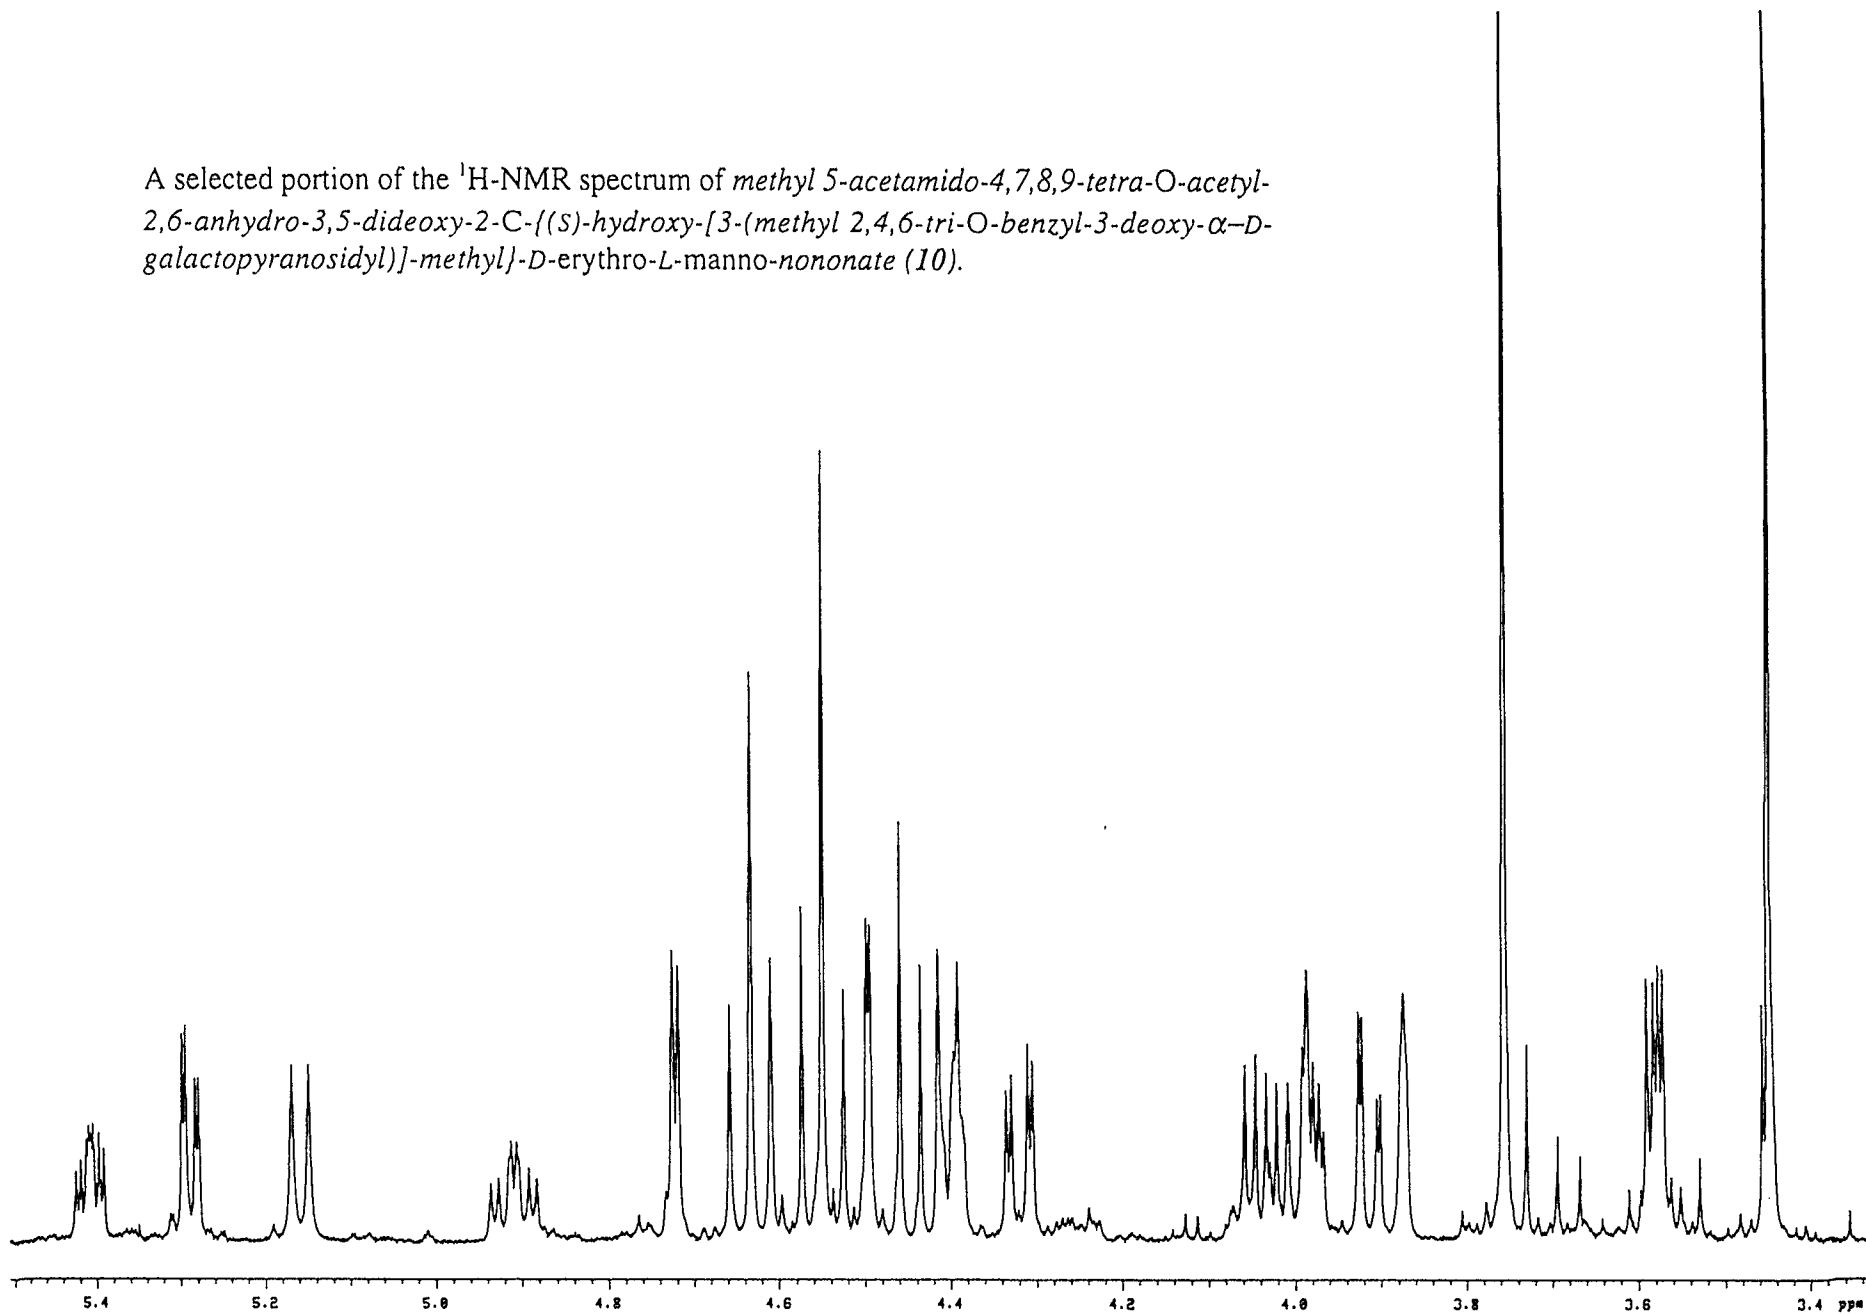

new experiment

exp2 pulse sequence: roesy

| SAMPLE         |           | 2D SPECTRUM   |          | ACQUISITION ARRAYS |       |
|----------------|-----------|---------------|----------|--------------------|-------|
| date           | Jul 15 96 | au1           | 5999.7   | array              | phase |
| temp           | 25.0      | n1            | 256      | arraydim           | 512   |
| solvent        | CDC13     | phase         | arrayed  |                    |       |
| PULSE SEQUENCE |           | PROCESSING    |          | 1                  | phase |
| d1             | 3         | fn            | 2048     | 1                  | 1     |
| p1             | 6.5       | gf            | 0.079    | 2                  | 2     |
| plvl           | 56        | gfa           | not used |                    |       |
| pw             | 4.3       | 2D PROCESSING |          |                    |       |
| mix            | 0.100     | fn1           | 512      |                    |       |
| ratio          | 2.000     | gf1           | 0.020    |                    |       |
| rocomp         | n         | gfa1          | not used |                    |       |
| sapul          | n         | DISPLAY       |          |                    |       |
| hs             | nn        | ap            | 785.3    |                    |       |
| salmode        | n         | up            | 2099.6   |                    |       |
| OBSERVE        |           | us            | 100      |                    |       |
| tn             | H1        | sc            | 10       |                    |       |
| dirq           | 499.725   | uc            | 115      |                    |       |
| tof            | 0         | axia          | pp       |                    |       |
| pu90           | 6.6       | rfl           | 505.0    |                    |       |
| tpur           | 44        | rfp           | 0        |                    |       |
| DECOUPLE       |           | lp            | 28.8     |                    |       |
| dn             | H1        | rp            | 720.7    |                    |       |
| dirq           | 499.724   | ai            | cdc ph   |                    |       |
| dof            | -788.9    | 2D DISPLAY    |          |                    |       |
| dpur           | 7         | ap1           | 742.0    |                    |       |
| homo           | v         | up1           | 2117.5   |                    |       |
| DEC2           |           | th            | 0        |                    |       |
| dn2            | sc2       |               | 0        |                    |       |
| dirq2          | 0         | uc2           | 115      |                    |       |
| dof2           | 0         | rfl1          | 505.0    |                    |       |
| dpur2          | 1         | rfl1          | 0        |                    |       |
| homo2          | n         | lp1           | 2.0      |                    |       |
| SPECTRUM       |           | rp1           | 5.4      |                    |       |
| su             | 5999.7    |               |          |                    |       |
| fb             | 3300      |               |          |                    |       |
| at             | 0.171     |               |          |                    |       |
| np             | 2048      |               |          |                    |       |
| nt             | 4         |               |          |                    |       |
| ss             | 8         |               |          |                    |       |
| gain           | 40        |               |          |                    |       |

A selected portion of the  $^1\text{H}$ - $^1\text{H}$  ROESY ( $\tau_m=100$  ms) spectrum of *methyl 5-acetamido-4,7,8,9-tetra-O-acetyl-2,6-anhydro-3,5-dideoxy-2-C-[(S)-hydroxy-[3-(methyl 2,4,6-tri-O-benzyl-3-deoxy- $\alpha$ -D-galactopyranosidyl)]-methyl]-D-erythro-L-manno-nononate (10)*.

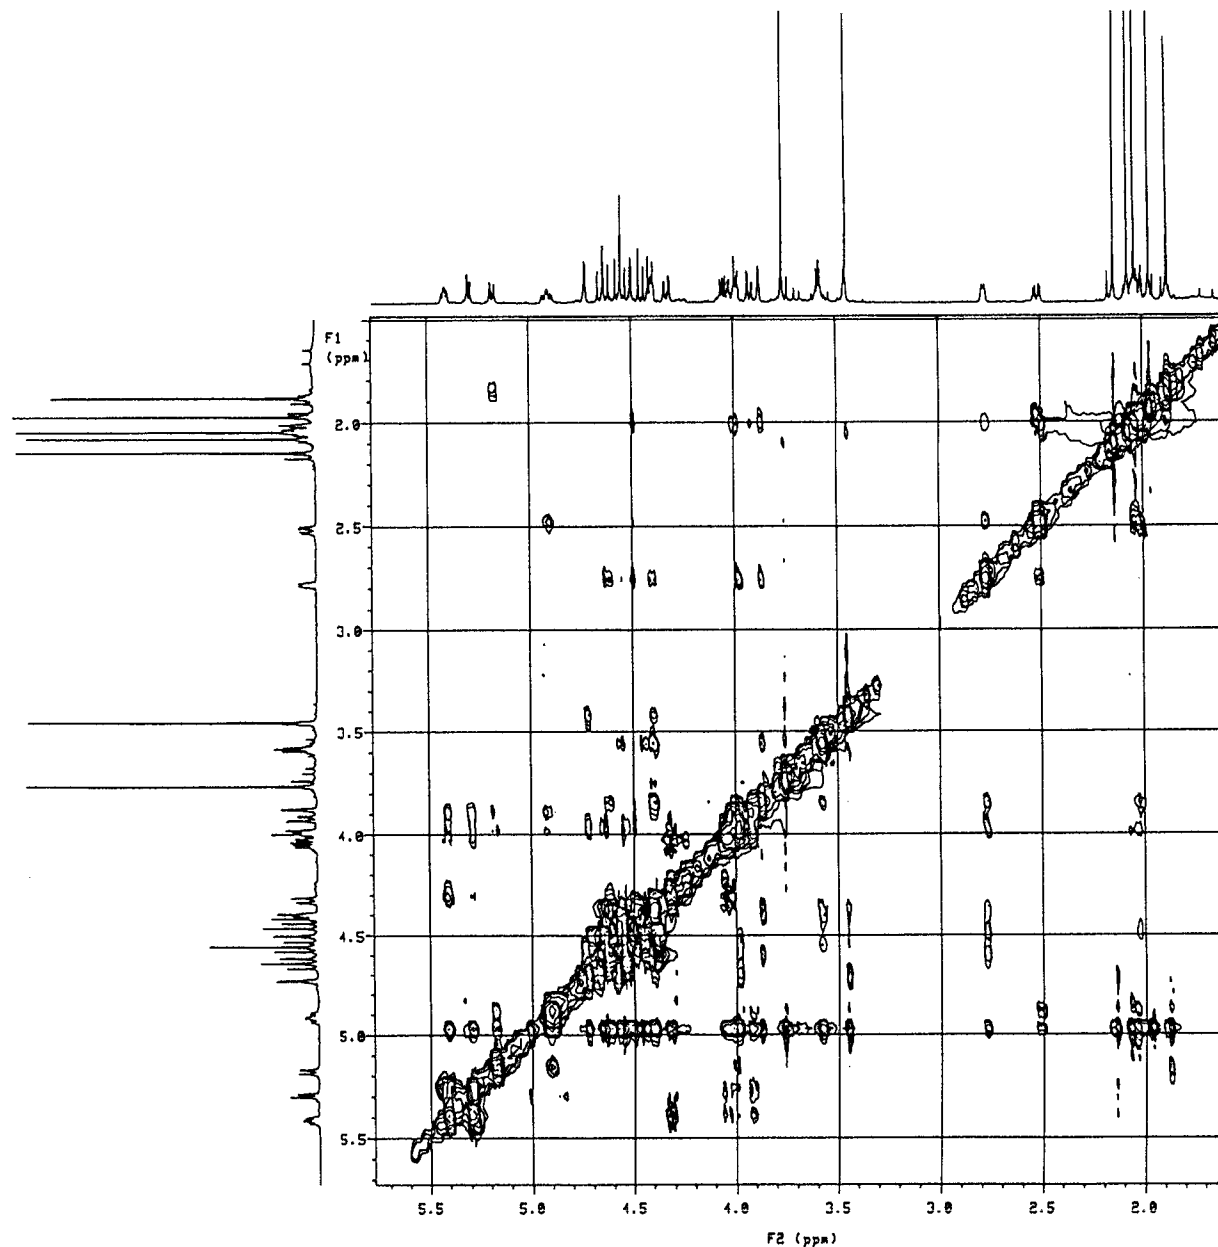

exp7 pulse sequence: roesy

| SAMPLE         |           | 2D SPECTRUM   |          | ACQUISITION ARRAYS |       |
|----------------|-----------|---------------|----------|--------------------|-------|
| date           | Jul 16 96 | swl           | 5999.7   | array              | phase |
| temp           | 25.0      | ni            | 256      | arraydim           | 512   |
| solvent        | CDC13     | phase         | arrayed  |                    |       |
| PULSE SEQUENCE |           | PROCESSING    |          | 1                  | phase |
| d1             | 3         | fn            | 2048     | 1                  | 1     |
| p1             | 6.5       | gf            | 0.079    | 2                  | 2     |
| pilvl          | 56        | gfs           | not used |                    |       |
| pw             | 4.3       | 2D PROCESSING |          |                    |       |
| mix            | 0.700     | fn1           | 512      |                    |       |
| ratio          | 2.000     | gfi           | 0.020    |                    |       |
| rocomp         | n         | gfal          | not used |                    |       |
| aspul          | n         | DISPLAY       |          |                    |       |
| hs             | nn        | sp            | 746.8    |                    |       |
| satmode        | n         | up            | 2099.6   |                    |       |
| OBSERVE        |           | vs            | 111      |                    |       |
| tn             | H1        | ac            | 10       |                    |       |
| afreq          | 499.725   | uc            | 115      |                    |       |
| tof            | 0         | axis          | pp       |                    |       |
| pu00           | 6.6       | rfl           | 496.6    |                    |       |
| tpur           | 44        | rfp           | 0        |                    |       |
| DECOUPLE       |           | lp            | 26.5     |                    |       |
| dn             | H1        | rp            | 1.3      |                    |       |
| dfrq           | 499.724   | ai            | cdc ph   |                    |       |
| dof            | -788.9    | 2D DISPLAY    |          |                    |       |
| dpr            | 7         | sp1           | 723.5    |                    |       |
| homo           | v         | up1           | 2094.0   |                    |       |
| DEC2           |           | th            | 1        |                    |       |
| dn2            | 0         | sc2           | 0        |                    |       |
| dfrq2          | 0         | uc2           | 115      |                    |       |
| dof2           | 0         | rfl1          | 500.0    |                    |       |
| dpr2           | 1         | rfpl          | 0        |                    |       |
| homo2          | n         | lp1           | -1.2     |                    |       |
| SPECTRUM       |           | rp1           | 6.5      |                    |       |
| aw             | 5999.7    |               |          |                    |       |
| fb             | 3300      |               |          |                    |       |
| at             | 0.171     |               |          |                    |       |
| np             | 2048      |               |          |                    |       |
| ct             | 4         |               |          |                    |       |
| sa             | 8         |               |          |                    |       |
| gain           | 40        |               |          |                    |       |

A selected portion of the  $^1\text{H}$ - $^1\text{H}$  ROESY ( $\tau_m=700$  ms) spectrum of *methyl 5-acetamido-4,7,8,9-tetra-O-acetyl-2,6-anhydro-3,5-dideoxy-2-C-((S)-hydroxy-[3-(methyl 2,4,6-tri-O-benzyl-3-deoxy- $\alpha$ -D-galactopyranosidyl)]-methyl)-D-erythro-L-manno-nononate (10)*.

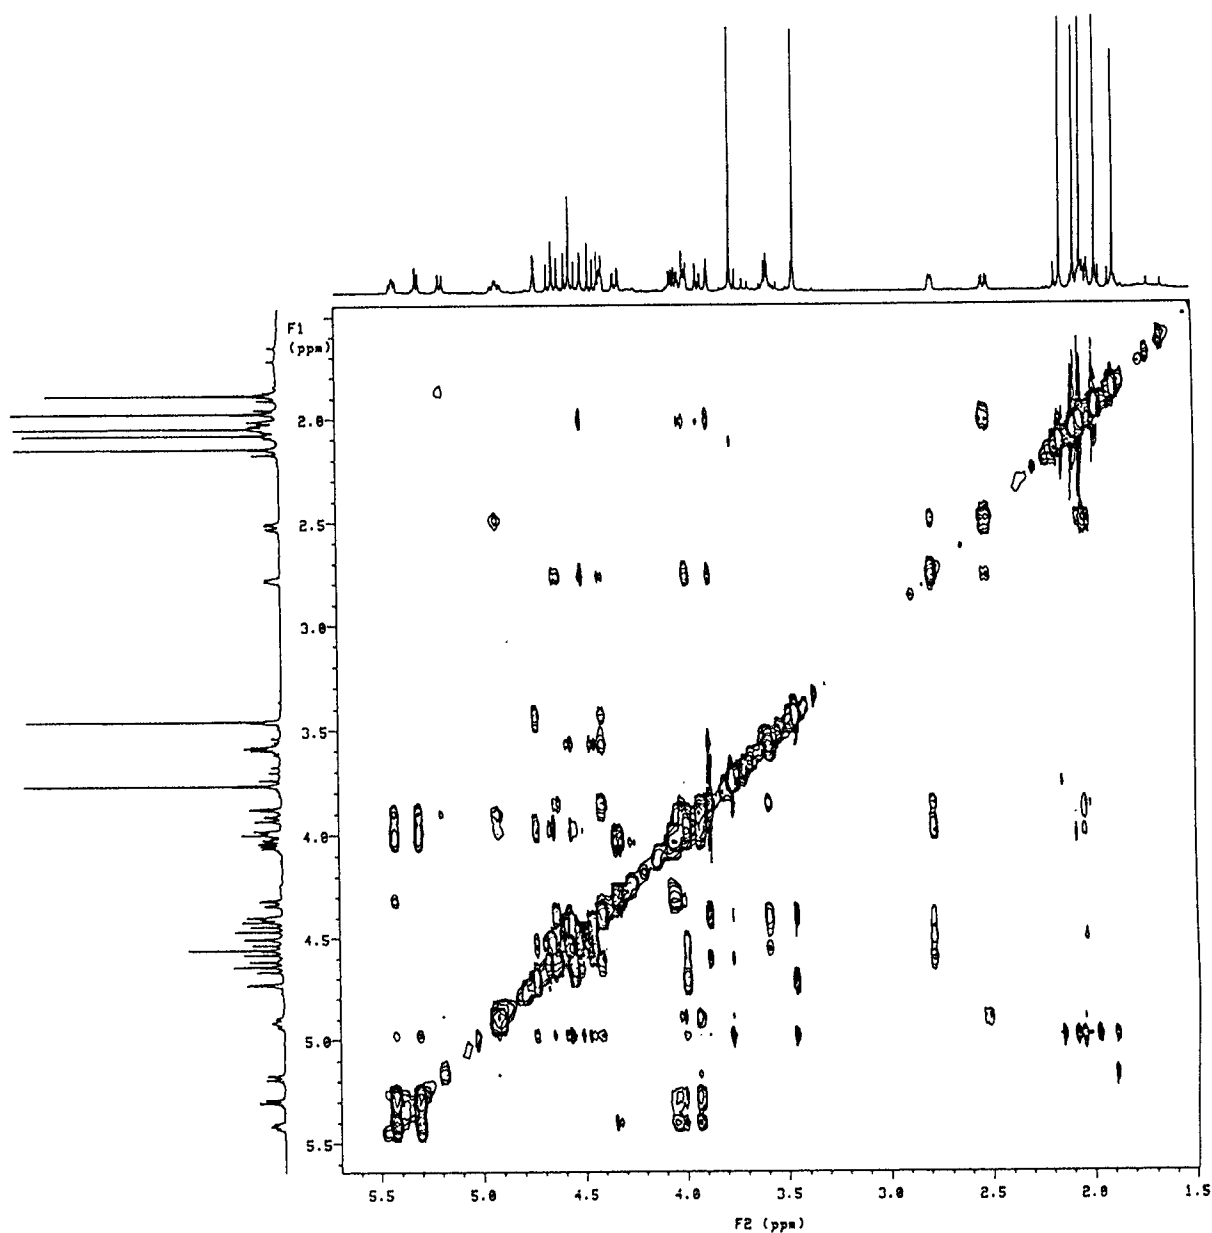

Supplement: NIHMS725265-supplement-Supplemental.pdf [file NIHMS725265-supplement-Supplemental.pdf]
